# Supplementary material for: Thermodynamic model for methanesulphonic acid recovery by tri-n-butyl phosphate
Source: Royal Society of Chemistry journal article supplement (doi:10.1039/d6ra00938g), 2026-04-07
Supplement: d6ra00938g1.pdf [file d6ra00938g1.pdf]

# Thermodynamic model for methanesulfonic acid recovery by tri-n-butyl phosphate

Rayco Lommelen,<sup>a\*</sup> Charlotte Lempereur,<sup>a†</sup> and Koen Binnemans<sup>a</sup>

<sup>a</sup>KU Leuven, Department of Chemistry, Celestijnenlaan 200F, P.O. box 2404, B-3001 Leuven,  
Belgium

\* Corresponding author: Email: [rayco.lommelen@kuleuven.be](mailto:rayco.lommelen@kuleuven.be)

## Supplementary Information (SI)

† New address: Université Grenoble Alpes, Université Savoie Mont-Blanc, CNRS, Grenoble INP,  
LEPMI, 38000 Grenoble, France

## 1. Experimental details and results

Explanation for abbreviations in tables:

- a = aqueous phase
- o = organic phase
- in = initial
- e = equilibrium
- $\rho$  = density
- $O/A$  = organic to aqueous volumetric ratio
- $D_{MSA}$  = distribution ratio =  $\frac{[MSA]_{o,e}}{[MSA]_{a,e}}$
- $E_{MSA}$  = extraction efficiency =  $\frac{[MSA]_{o,e} \cdot (O/A)_e}{[MSA]_{aq,in}} \cdot 100$
- $L_{MSA}$  = extractant loading =  $\frac{[MSA]_{o,e} \cdot (O/A)_e}{[TBP]_{o,in}} \cdot 100$

The following equation can be used to convert the TBP concentration in *n*-dodecane from wt% to vol%:

$$[TBP] (vol\%) = \frac{[TBP] (wt\%) / \rho_{TBP}}{[TBP] (wt\%) / \rho_{TBP} + [dodecane] (wt\%) / \rho_{dodecane}}$$

with  $\rho_{TBP} = 973 \text{ g L}^{-1}$  and  $\rho_{dodecane} = 750 \text{ g L}^{-1}$ .

Table S1. Experimental details for MSA–100 vol% TBP system collected at 25 °C with  $O/A_{in} = 1$ .

| $[MSA]_{a,in}$<br>mol L <sup>-1</sup> | $[MSA]_{a,e}$<br>mol L <sup>-1</sup> | $[MSA]_{o,e}$<br>mol L <sup>-1</sup> | $\rho_o$<br>g mL <sup>-1</sup> | $[H_2O]_o$<br>mol L <sup>-1</sup> | $(O/A)_e$ | $D_{MSA}$ | $E_{MSA}$<br>% | $L_{MSA}$<br>% |
|---------------------------------------|--------------------------------------|--------------------------------------|--------------------------------|-----------------------------------|-----------|-----------|----------------|----------------|
| 0.00                                  | 0.00                                 | 0.00                                 | 0.976                          | 3.70                              | 1.13      |           |                |                |
| 0.10                                  | 0.10                                 |                                      | 0.976                          | 3.60                              |           |           |                |                |
| 0.25                                  | 0.25                                 | 0.00                                 | 0.976                          | 3.48                              | 1.18      | 0.008     | 0.93           | 0.1            |
| 0.49                                  | 0.51                                 | 0.01                                 | 0.976                          | 3.55                              | 1.12      | 0.013     | 1.39           | 0.2            |
| 0.74                                  | 0.76                                 | 0.01                                 | 0.976                          | 3.69                              | 1.13      | 0.018     | 1.97           | 0.4            |
| 0.98                                  | 1.01                                 | 0.02                                 | 0.977                          | 3.63                              | 1.13      | 0.024     | 2.57           | 0.7            |
| 1.96                                  | 1.96                                 | 0.11                                 | 0.981                          | 3.89                              | 1.15      | 0.056     | 5.95           | 3.2            |
| 2.96                                  | 2.79                                 | 0.29                                 | 0.989                          | 4.44                              | 1.20      | 0.104     | 10.69          | 8.7            |
| 3.94                                  | 3.60                                 | 0.66                                 | 1.006                          | 5.40                              | 1.33      | 0.184     | 19.14          | 20.9           |
| 4.93                                  | 4.35                                 | 1.09                                 | 1.024                          | 6.42                              | 1.49      | 0.249     | 26.37          | 35.9           |
| 5.92                                  | 5.34                                 | 1.67                                 | 1.046                          | 7.57                              | 1.80      | 0.313     | 36.39          | 59.5           |
| 7.89                                  | 6.82                                 | 2.83                                 | 1.093                          | 8.76                              | 2.65      | 0.415     | 52.12          | 117            |
| 9.86                                  | 7.20                                 | 4.62                                 | 1.160                          | 9.32                              | 7.35      | 0.642     | 82.53          | 225.           |

Table S2. Experimental details for MSA–TBP–dodecane system collected at 25 °C with  $O/A_{in} = 1$ .  
 $[n\text{-dodecane}]_{o,in} (\text{wt}\%) = 100\% - [\text{TBP}]_{o,in}$

| $[\text{MSA}]_{a,in}$ | $[\text{TBP}]_{o,in}$ | $[\text{MSA}]_{a,e}$ | $[\text{MSA}]_{o,e}$ | $\rho_o$           | $[\text{H}_2\text{O}]_o$ | $(O/A)_e$ | $D_{\text{MSA}}$ | $E_{\text{MSA}}$ | $L_{\text{MSA}}$ |
|-----------------------|-----------------------|----------------------|----------------------|--------------------|--------------------------|-----------|------------------|------------------|------------------|
| mol L <sup>-1</sup>   | wt%                   | mol L <sup>-1</sup>  | mol L <sup>-1</sup>  | g mL <sup>-1</sup> | mol L <sup>-1</sup>      |           |                  | %                | %                |
| 0.25                  | 50.2                  |                      |                      | 0.844              | 0.87                     |           |                  |                  |                  |
| 0.25                  | 60.2                  | 0.25                 | 0.00                 | 0.865              | 1.21                     | 1.04      | 0.001            | 0.1              | 0.0              |
| 0.25                  | 69.6                  | 0.25                 | 0.00                 | 0.891              | 1.51                     | 1.05      | 0.002            | 0.2              | 0.0              |
| 0.25                  | 79.5                  | 0.25                 | 0.00                 | 0.917              | 1.99                     | 1.06      | 0.003            | 0.3              | 0.0              |
| 0.25                  | 89.8                  | 0.25                 | 0.00                 | 0.945              | 2.62                     | 1.09      | 0.006            | 0.6              | 0.0              |
| 0.25                  | 95.0                  | 0.25                 | 0.00                 | 0.961              | 3.05                     | 1.10      | 0.007            | 0.7              | 0.1              |
| 1.97                  | 50.2                  | 1.98                 | 0.01                 | 0.844              | 0.73                     | 1.02      | 0.004            | 0.4              | 0.6              |
| 1.97                  | 60.2                  | 2.06                 | 0.01                 | 0.865              | 1.02                     | 1.04      | 0.007            | 0.7              | 0.7              |
| 1.97                  | 69.6                  | 2.07                 | 0.02                 | 0.892              | 1.38                     | 1.04      | 0.012            | 1.2              | 1.1              |
| 1.97                  | 79.5                  | 1.97                 | 0.04                 | 0.919              | 1.94                     | 1.07      | 0.020            | 2.0              | 1.5              |
| 1.97                  | 89.8                  | 2.05                 | 0.07                 | 0.948              | 2.58                     | 1.09      | 0.032            | 3.5              | 2.2              |
| 1.97                  | 95.0                  | 2.02                 | 0.09                 | 0.964              | 3.00                     | 1.11      | 0.042            | 4.5              | 2.7              |
| 3.91                  | 50.2                  | 3.93                 | 0.06                 | 0.848              | 0.78                     | 1.03      | 0.016            | 1.6              | 4.0              |
| 3.91                  | 60.2                  | 3.94                 | 0.10                 | 0.870              | 1.19                     | 1.06      | 0.026            | 2.7              | 5.5              |
| 3.91                  | 69.6                  | 3.67                 | 0.16                 | 0.899              | 1.67                     | 1.07      | 0.042            | 4.1              | 7.0              |
| 3.91                  | 79.5                  | 3.90                 | 0.28                 | 0.930              | 2.68                     | 1.13      | 0.073            | 7.7              | 11.1             |
| 3.91                  | 89.8                  | 3.76                 | 0.41                 | 0.964              | 3.71                     | 1.12      | 0.110            | 11.5             | 14.3             |
| 3.91                  | 95.0                  | 3.70                 | 0.50                 | 0.983              | 4.45                     | 1.25      | 0.135            | 14.2             | 16.4             |
| 5.87                  | 89.8                  | 5.94                 | 1.33                 | 1.004              | 5.78                     | 1.53      | 0.223            | 27.4             | 50.9             |
| 5.87                  | 95.0                  | 5.82                 | 1.51                 | 1.022              | 6.89                     | 1.70      | 0.259            | 32.4             | 56.1             |
| 7.82                  | 89.8                  | 7.64                 | 2.58                 | 1.070              | 7.93                     | 2.20      | 0.337            | 45.3             | 112              |
| 7.82                  | 95.0                  | 7.61                 | 2.61                 | 1.070              | 7.99                     | 2.36      | 0.342            | 46.8             | 108              |
| 9.78                  | 95.0                  | 8.84                 | 4.38                 | 1.143              | 8.86                     | 5.42      | 0.496            | 75.7             | 219              |

Table S3. Experimental details for MSA–100 vol% TBP system with  $O/A_{in} = 1$ .

| $[MSA]_{a,in}$<br>mol L <sup>-1</sup> | T<br>°C | $[MSA]_{aq,e}$<br>mol L <sup>-1</sup> | $[MSA]_{org,e}$<br>mol L <sup>-1</sup> | $[H_2O]_{org}$<br>mol L <sup>-1</sup> | $(O/A)_e$         | $D_{MSA}$ | $E_{MSA}$<br>%   | $L_{MSA}$<br>%   |
|---------------------------------------|---------|---------------------------------------|----------------------------------------|---------------------------------------|-------------------|-----------|------------------|------------------|
| 2.02                                  | 24      | 2.04                                  | 0.11                                   |                                       | 1.13 <sup>a</sup> | 0.052     | 5.5 <sup>a</sup> | 3.1 <sup>a</sup> |
| 2.02                                  | 40      | 2.13                                  | 0.06                                   |                                       | 1.11 <sup>a</sup> | 0.030     | 3.4 <sup>a</sup> | 1.9 <sup>a</sup> |
| 2.02                                  | 59      | 2.13                                  | 0.05                                   |                                       | 1.11 <sup>a</sup> | 0.024     | 2.7 <sup>a</sup> | 1.5 <sup>a</sup> |
| 2.02                                  | 77      | 2.14                                  | 0.04                                   |                                       | 1.11 <sup>a</sup> | 0.019     | 2.1 <sup>a</sup> | 1.2 <sup>a</sup> |
| 4.01                                  | 24      | 4.04                                  | 0.66                                   |                                       | 1.38 <sup>a</sup> | 0.163     | 19 <sup>a</sup>  | 21 <sup>a</sup>  |
| 4.01                                  | 40      | 4.12                                  | 0.52                                   |                                       | 1.27 <sup>a</sup> | 0.125     | 14 <sup>a</sup>  | 16 <sup>a</sup>  |
| 4.01                                  | 59      | 4.25                                  | 0.35                                   |                                       | 1.21 <sup>a</sup> | 0.081     | 10 <sup>a</sup>  | 10 <sup>a</sup>  |
| 4.01                                  | 77      | 4.27                                  | 0.35                                   |                                       | 1.20 <sup>a</sup> | 0.081     | 10 <sup>a</sup>  | 11 <sup>a</sup>  |
| 6.01                                  | 24      | 5.74                                  | 1.67                                   | 7.78                                  | 1.843             | 0.290     | 35.9             | 32.4             |
| 6.01                                  | 40      | 5.79                                  | 1.51                                   | 6.59                                  | 1.645             | 0.260     | 31.1             | 31.5             |
| 6.01                                  | 59      | 5.66                                  | 1.17                                   | 3.22                                  | 1.305             | 0.207     | 22.0             | 28.1             |
| 6.01                                  | 77      | 5.92                                  | 1.16                                   | 2.05                                  | 1.250             | 0.196     | 21.4             | 28.4             |
| 8.01                                  | 24      | 7.42                                  | 2.97                                   |                                       | 2.56 <sup>a</sup> | 0.400     | 52 <sup>a</sup>  | 114 <sup>a</sup> |
| 8.01                                  | 40      | 7.49                                  | 2.83                                   |                                       | 2.05 <sup>a</sup> | 0.378     | 45 <sup>a</sup>  | 101 <sup>a</sup> |
| 8.01                                  | 59      | 7.33                                  | 2.38                                   |                                       | 1.71 <sup>a</sup> | 0.324     | 35 <sup>a</sup>  | 78 <sup>a</sup>  |
| 8.01                                  | 77      | 7.15                                  | 2.32                                   |                                       | 1.59 <sup>a</sup> | 0.324     | 33 <sup>a</sup>  | 73 <sup>a</sup>  |

<sup>a</sup> Determined based on equilibrium volumes calculated by the thermodynamic model

Table S4. Experimental details for MSA–Ni(CH<sub>3</sub>SO<sub>3</sub>)<sub>2</sub>–100 vol% TBP at 25 °C with  $O/A_{in} = 1$ .

| [MSA] <sub>a,in</sub><br>mol L <sup>-1</sup> | [Ni(MSA) <sub>2</sub> ] <sub>a,in</sub><br>mol L <sup>-1</sup> | [MSA] <sub>aq,e</sub><br>mol L <sup>-1</sup> | [MSA] <sub>org,e</sub><br>mol L <sup>-1</sup> | $\rho_o$<br>g mL <sup>-1</sup> | [H <sub>2</sub> O] <sub>org</sub><br>mol L <sup>-1</sup> | (O/A) <sub>e</sub> | $D_{MSA}$ | $E_{MSA}$<br>% | $L_{MSA}$<br>% |
|----------------------------------------------|----------------------------------------------------------------|----------------------------------------------|-----------------------------------------------|--------------------------------|----------------------------------------------------------|--------------------|-----------|----------------|----------------|
| 4.60                                         | 0.00                                                           | 4.48                                         | 0.92                                          | 1.015                          | 6.46                                                     | 1.56               | 0.205     | 24.4           | 30.9           |
| 4.60                                         | 0.26                                                           | 4.33                                         | 1.10                                          | 1.022                          | 6.69                                                     | 1.63               | 0.253     | 29.6           | 37.5           |
| 4.60                                         | 0.53                                                           | 4.04                                         | 1.19                                          | 1.026                          | 6.55                                                     | 1.63               | 0.295     | 32.1           | 40.7           |
| 4.60                                         | 0.79                                                           | 3.82                                         | 1.34                                          | 1.032                          | 6.62                                                     | 1.67               | 0.350     | 36.4           | 46.0           |
| 4.60                                         | 1.05                                                           | 3.59                                         | 1.48                                          | 1.041                          | 6.49                                                     | 1.78               | 0.412     | 41.1           | 52.1           |
| 4.60                                         | 1.31                                                           | 3.36                                         | 1.60                                          | 1.042                          | 6.22                                                     | 1.78               | 0.475     | 44.5           | 56.4           |
| 4.60                                         | 1.47                                                           | 3.17                                         | 1.65                                          | 1.048                          | 6.06                                                     | 1.78               | 0.522     | 46.0           | 58.3           |
| 7.66                                         | 0.00                                                           | 7.06                                         | 2.87                                          | 1.085                          | 9.21                                                     | 2.61               | 0.407     | 52.8           | 112            |
| 7.66                                         | 0.26                                                           | 6.40                                         | 2.94                                          | 1.089                          | 8.51                                                     | 2.75               | 0.460     | 54.9           | 116            |
| 7.66                                         | 0.53                                                           | 6.36                                         | 3.04                                          | 1.094                          | 7.75                                                     | 2.92               | 0.479     | 58.0           | 123            |

## 2. Thermodynamic model fits to experimental data

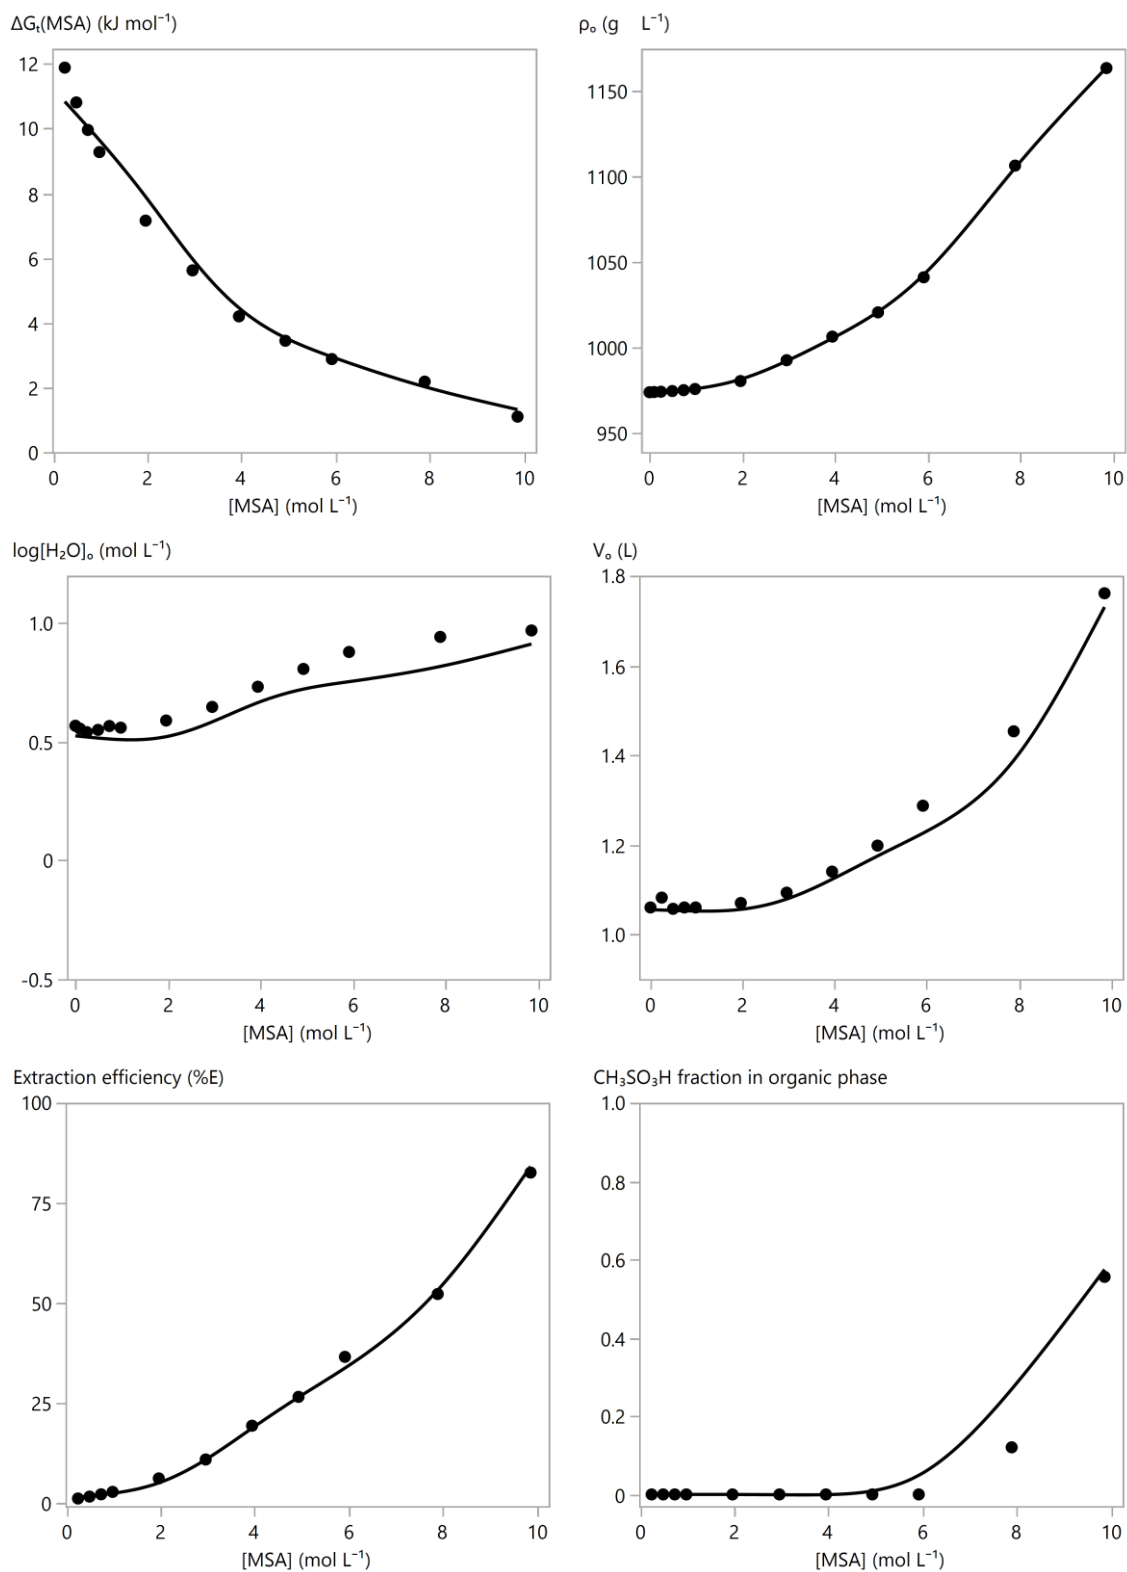

Figure S1. Model fit (lines) to experimental data (markers) with undiluted TBP at 25 °C from Table S1. Experimental  $\text{CH}_3\text{SO}_3\text{H}$  values are based on %L.

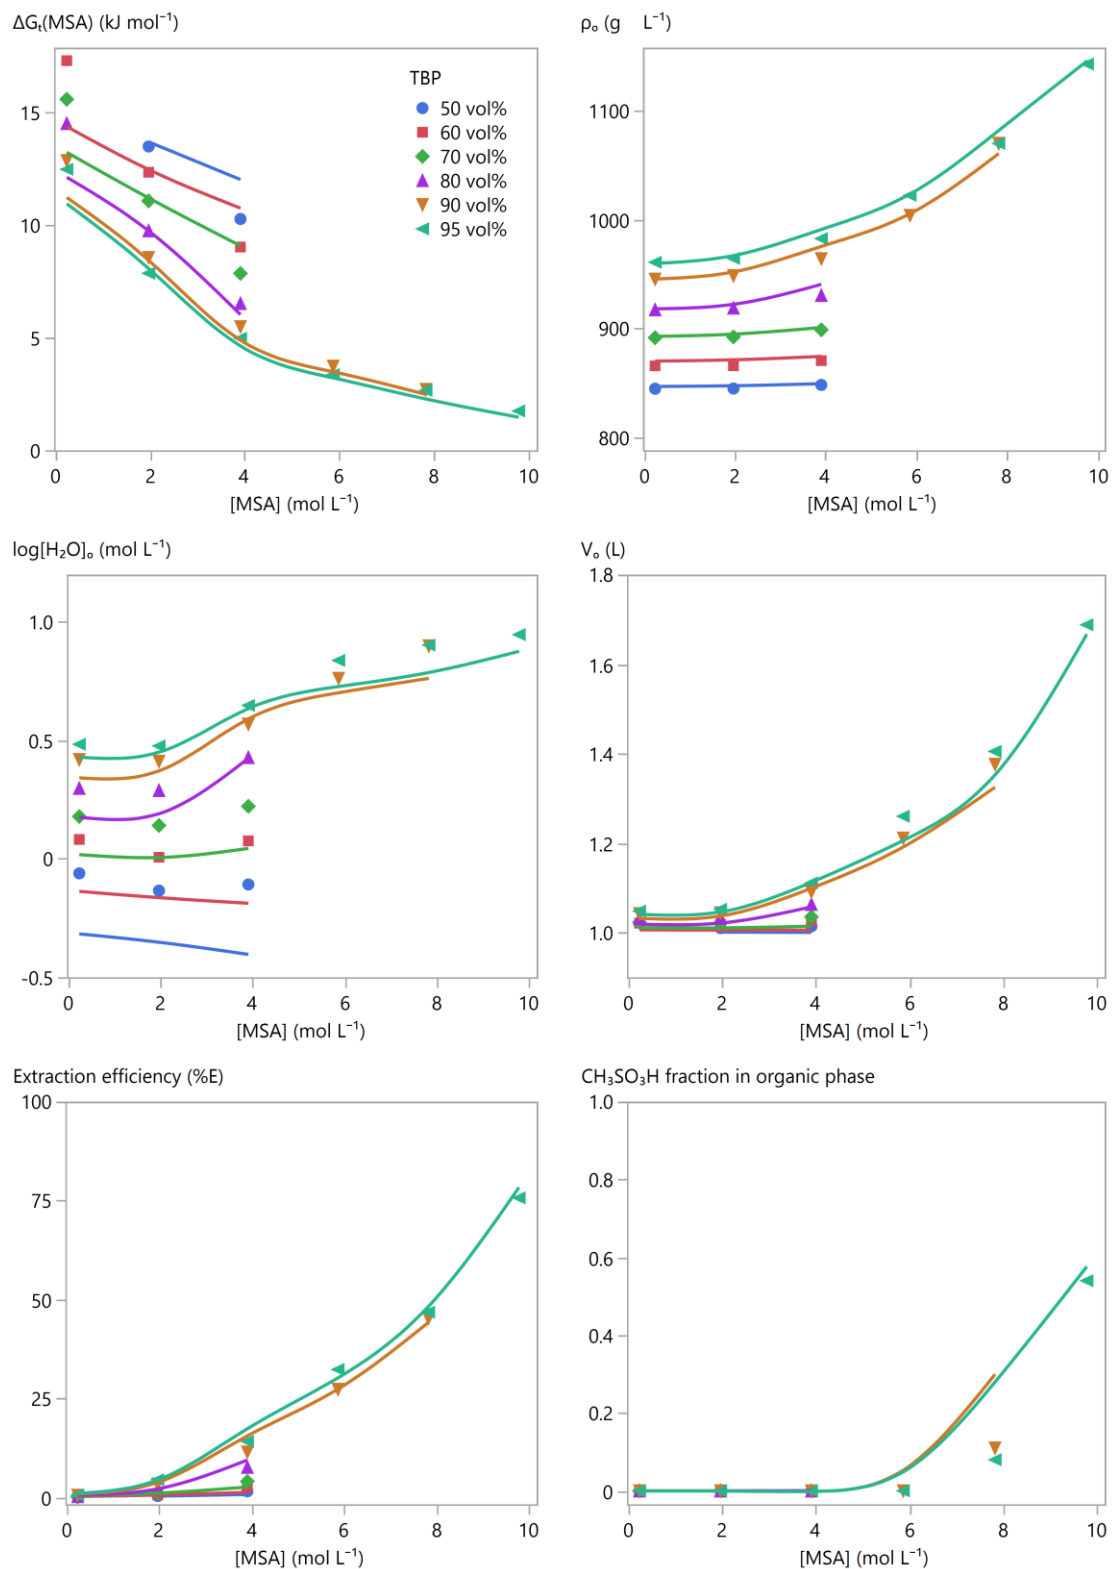

Figure S2. Model fit (lines) to experimental data (markers) with diluted TBP at 25 °C from Table S2. Experimental  $\text{CH}_3\text{SO}_3\text{H}$  values are based on %L.

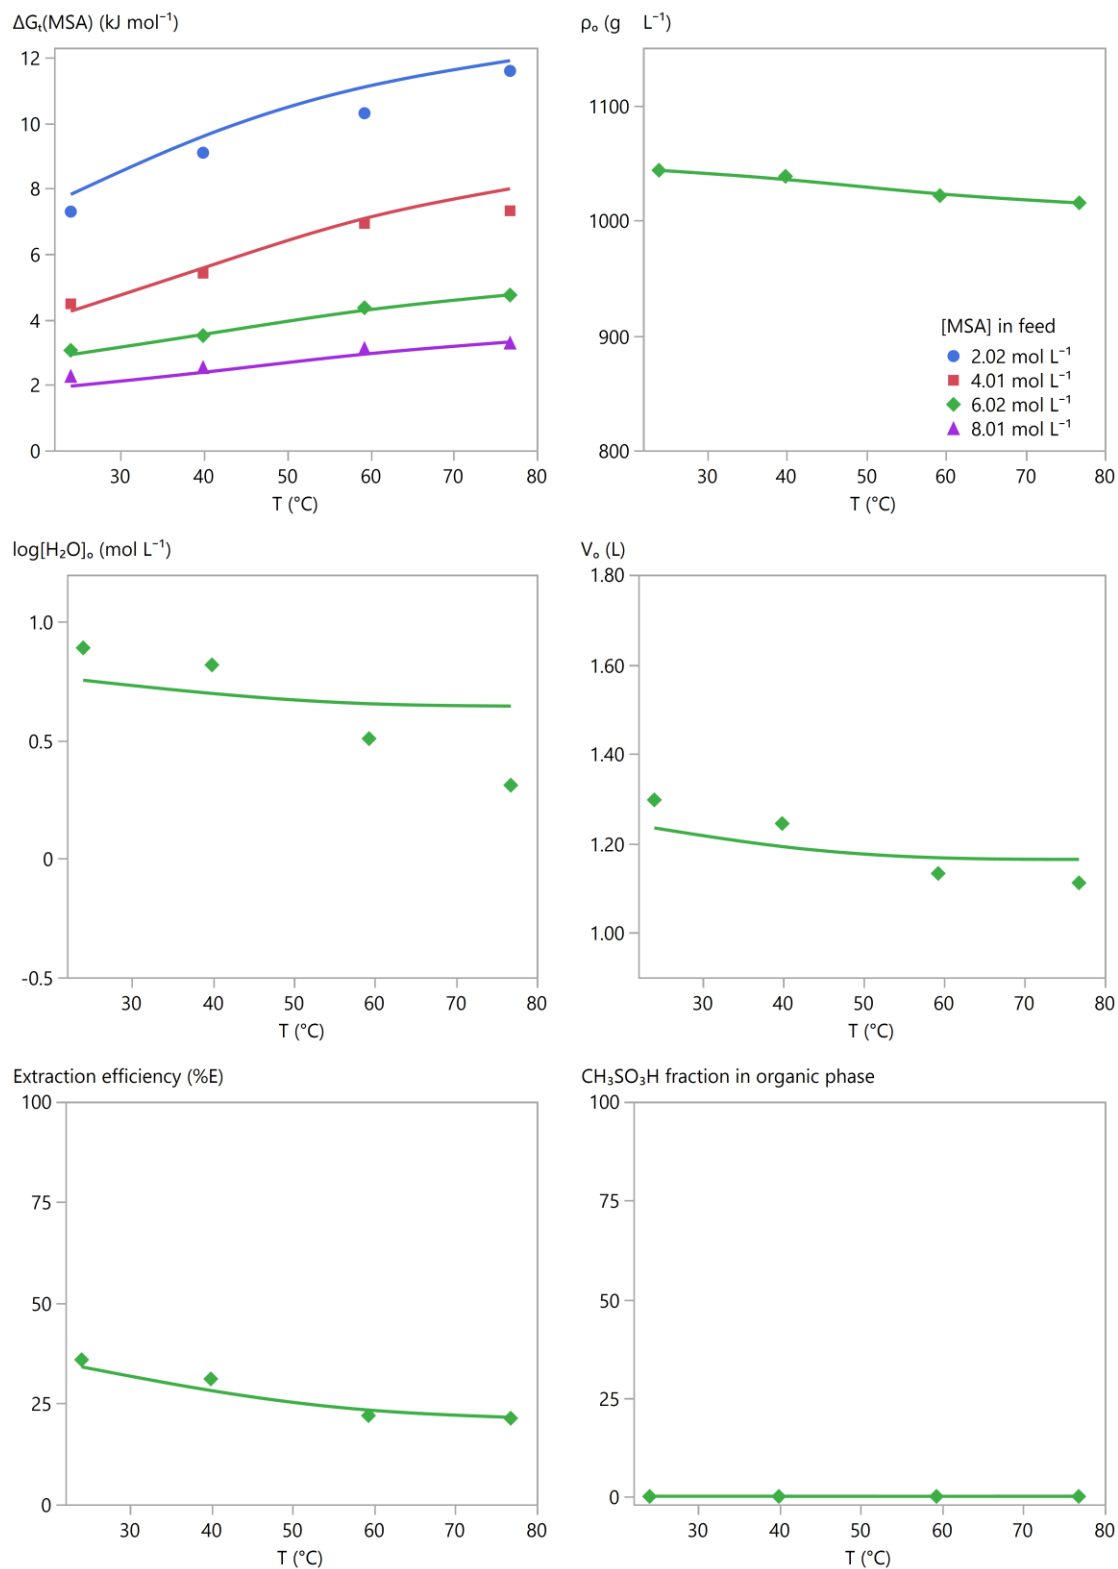

Figure S3. Model fit (lines) to experimental data (markers) with undiluted TBP at different temperatures from Table S1. Experimental  $\text{CH}_3\text{SO}_3\text{H}$  values are based on %L.

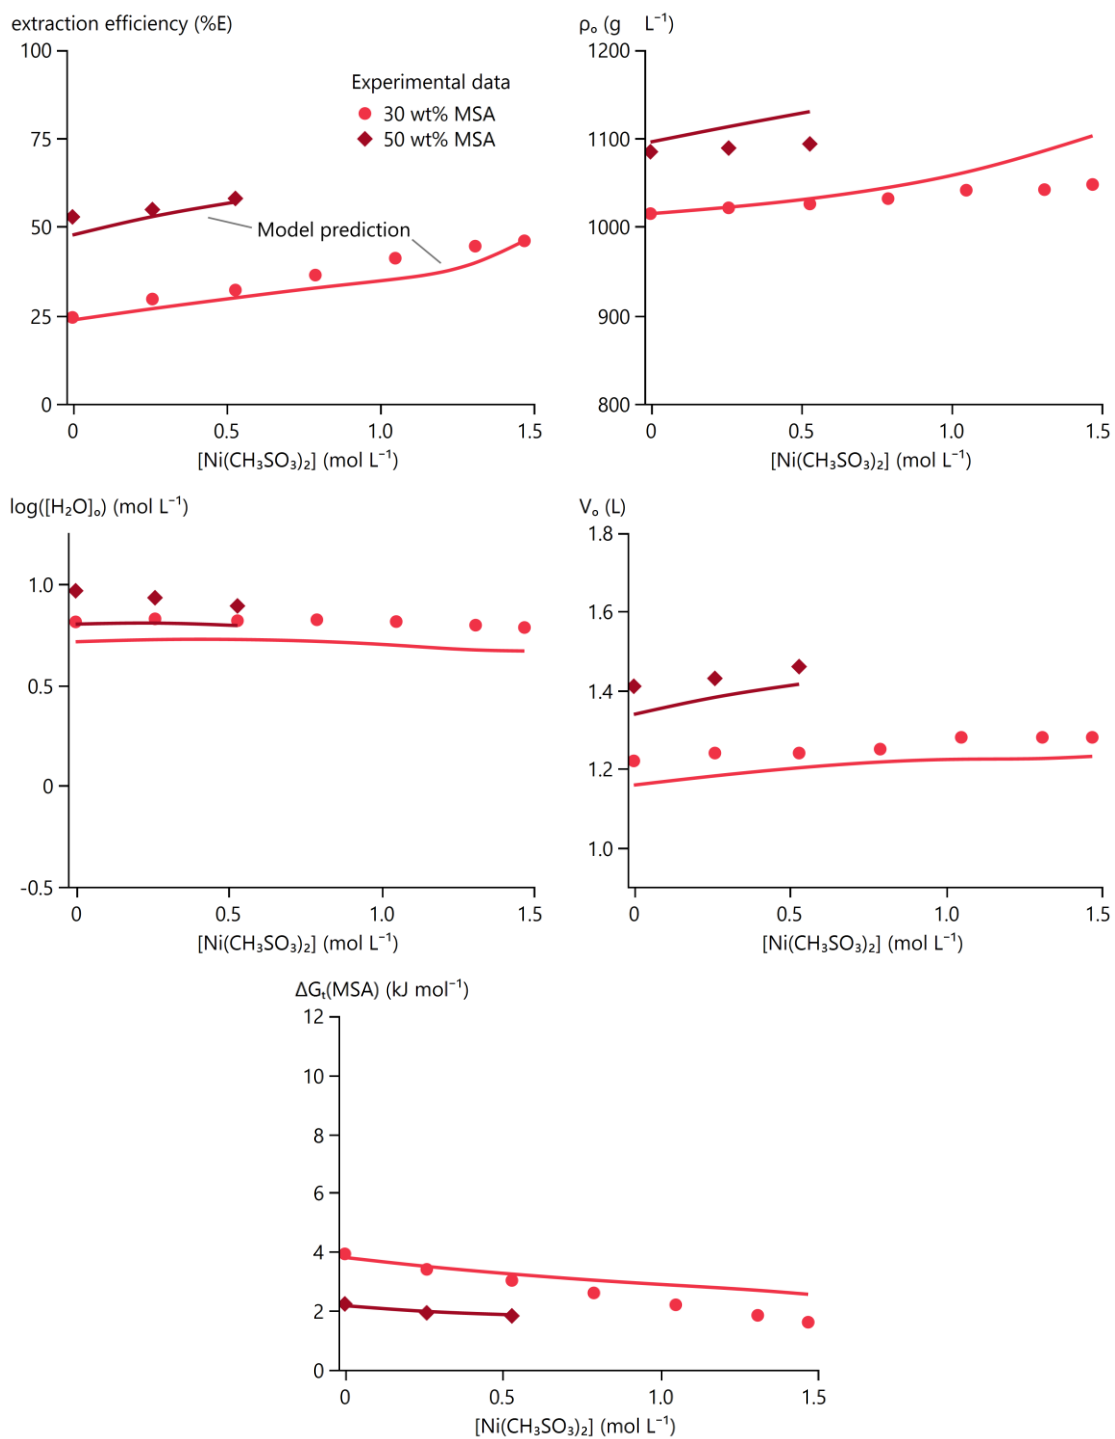

Figure S4. Model fit (lines) to experimental data (markers) on the MSA-Ni(CH<sub>3</sub>SO<sub>3</sub>)<sub>2</sub>-H<sub>2</sub>O-TBP system at 25 °C from Table S4.

### 3. Simulation of a solvent extraction process for MSA recovery

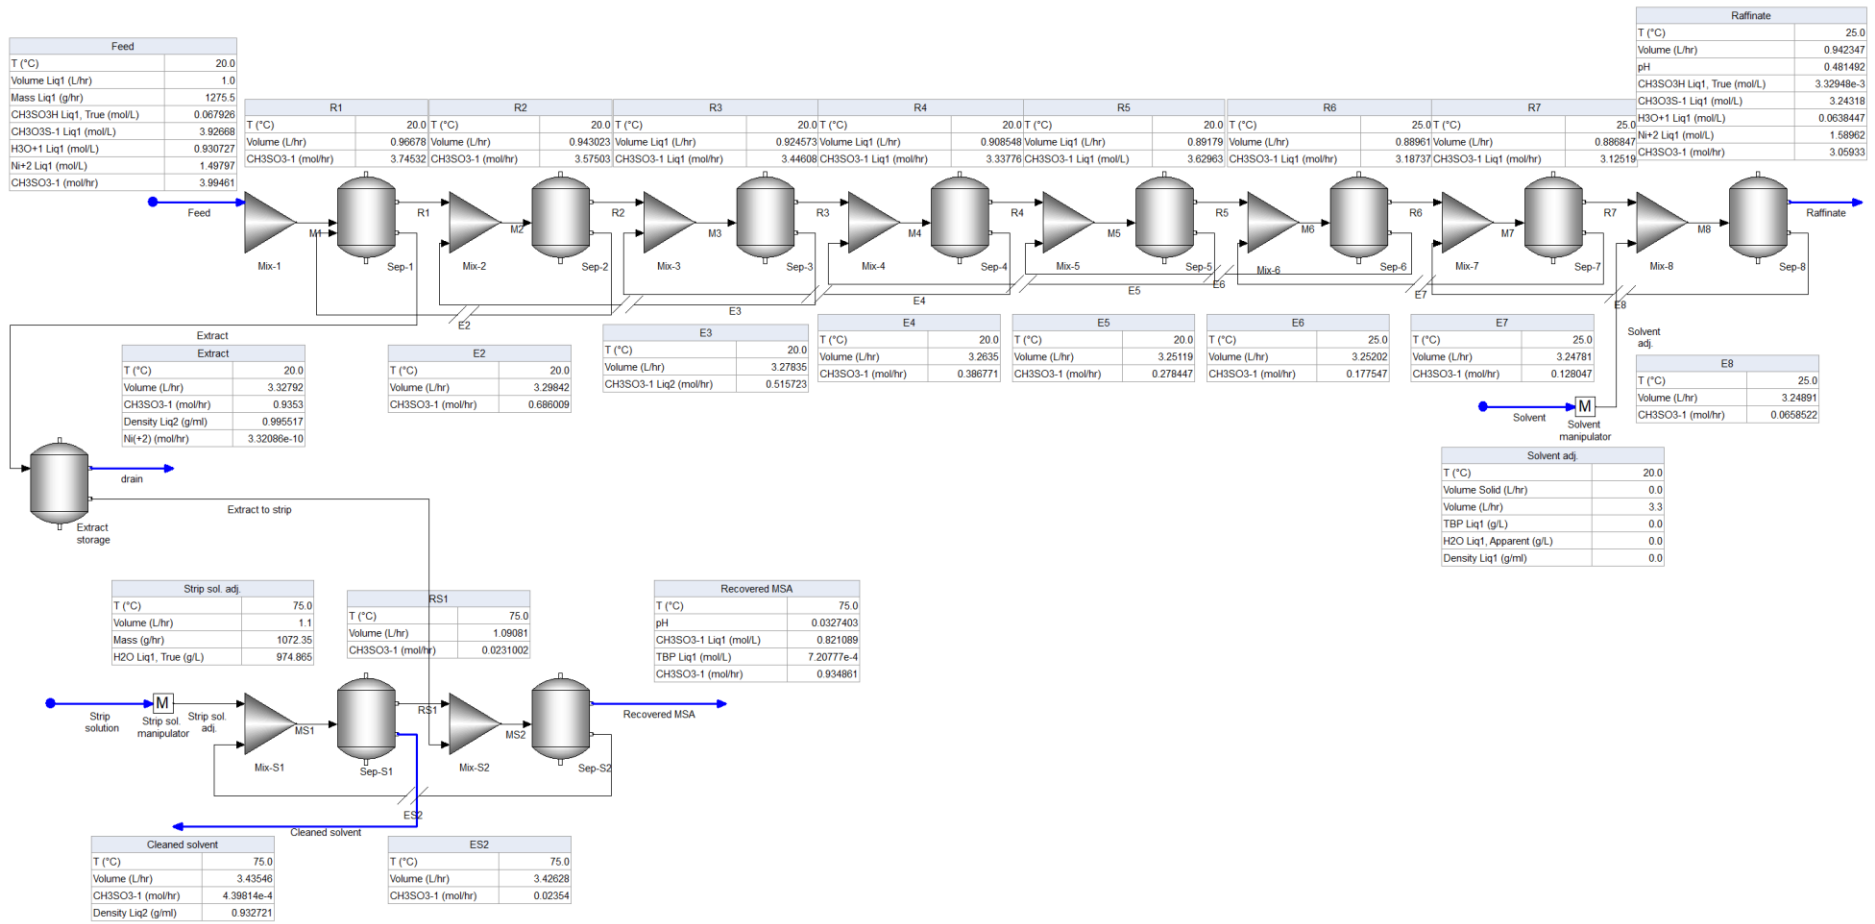

Figure S5. Flowsheet for MSA recovery with 8 extraction and 3 stripping stages developed in OLI Flowsheet version 12.0 from OLI Systems.

#### 4. TBP and *n*-dodecane concentration conversion table

Table S5. Molar amounts and masses of tri-*n*-butyl phosphate (TBP), and *n*-dodecane (dod.) that must be mixed to obtain a certain concentration of TBP (in vol.%) in 1 litre of solvent.

| <b>TBP<br/>(vol%)</b> | <b>n<sub>TBP</sub> in<br/>(mole)</b> | <b>n<sub>dod.</sub><br/>(mole)</b> | <b>m<sub>TBP</sub> in<br/>(g)</b> | <b>m<sub>dod.</sub><br/>(g)</b> |
|-----------------------|--------------------------------------|------------------------------------|-----------------------------------|---------------------------------|
| 0                     | 0                                    | 4.40                               | 0                                 | 750                             |
| 5                     | 0.18                                 | 4.18                               | 49                                | 713                             |
| 10                    | 0.36                                 | 3.96                               | 97                                | 675                             |
| 15                    | 0.55                                 | 3.74                               | 146                               | 638                             |
| 20                    | 0.73                                 | 3.52                               | 194                               | 600                             |
| 25                    | 0.91                                 | 3.30                               | 243                               | 563                             |
| 30                    | 1.09                                 | 3.08                               | 292                               | 525                             |
| 35                    | 1.28                                 | 2.86                               | 340                               | 488                             |
| 40                    | 1.46                                 | 2.64                               | 389                               | 450                             |
| 45                    | 1.64                                 | 2.42                               | 437                               | 413                             |
| 50                    | 1.82                                 | 2.20                               | 486                               | 375                             |
| 60                    | 2.19                                 | 1.76                               | 583                               | 300                             |
| 70                    | 2.55                                 | 1.32                               | 680                               | 225                             |
| 80                    | 2.92                                 | 0.88                               | 778                               | 150                             |
| 90                    | 3.28                                 | 0.44                               | 875                               | 75                              |
| 100                   | 3.65                                 | 0.00                               | 972                               | 0                               |
